# Supplementary material for: A newly designed softoxometalate [BMIm]2[DMIm][α-PW12O40]@hydrocalumite that controls the chain length of polyacrylic acid in the presence of light
Source: Royal Society of Chemistry journal article supplement (doi:10.1039/c6ra02685k), 2016-01-01
Supplement: c6ra02685k1.pdf [file c6ra02685k1.pdf]

**Supporting online materials for**

**A Newly Designed Softoxometalate [Bmim]<sub>2</sub>[Dmim][ $\alpha$ -PW<sub>12</sub>O<sub>40</sub>]@Hydrocalumite that Control the Chain Length of Polyacrylic Acid in Presence of Light**

Santu Das, Soumyajit Roy\*

**Content**

|                                                       |    |
|-------------------------------------------------------|----|
| Dispersion of hydrocalumite and SOM <b>2</b>          | S1 |
| EDS mapping of SOM <b>2</b>                           | S2 |
| Hydrodynamic radius of hydrocalumite and SOM <b>2</b> | S3 |
| SEM image of polyacrylic acid                         | S4 |
| HATR-IR spectrum of PAA                               | S5 |
| Variation of molecular weight of PAA with time        | S6 |
| Variation of molecular weight distribution with time  | S7 |

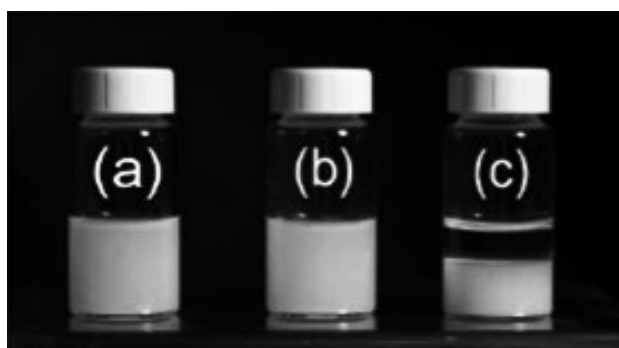

**Fig S1.** a) Dispersion of hydrocalumite. b) Formation of composite  $[\text{BMIm}]_2[\text{DMIm}][\alpha\text{-PW}_{12}\text{O}_{40}]@$ Hydrocalumite (SOM **2**). c) gelation of SOM 2 indicates formation of composite material.

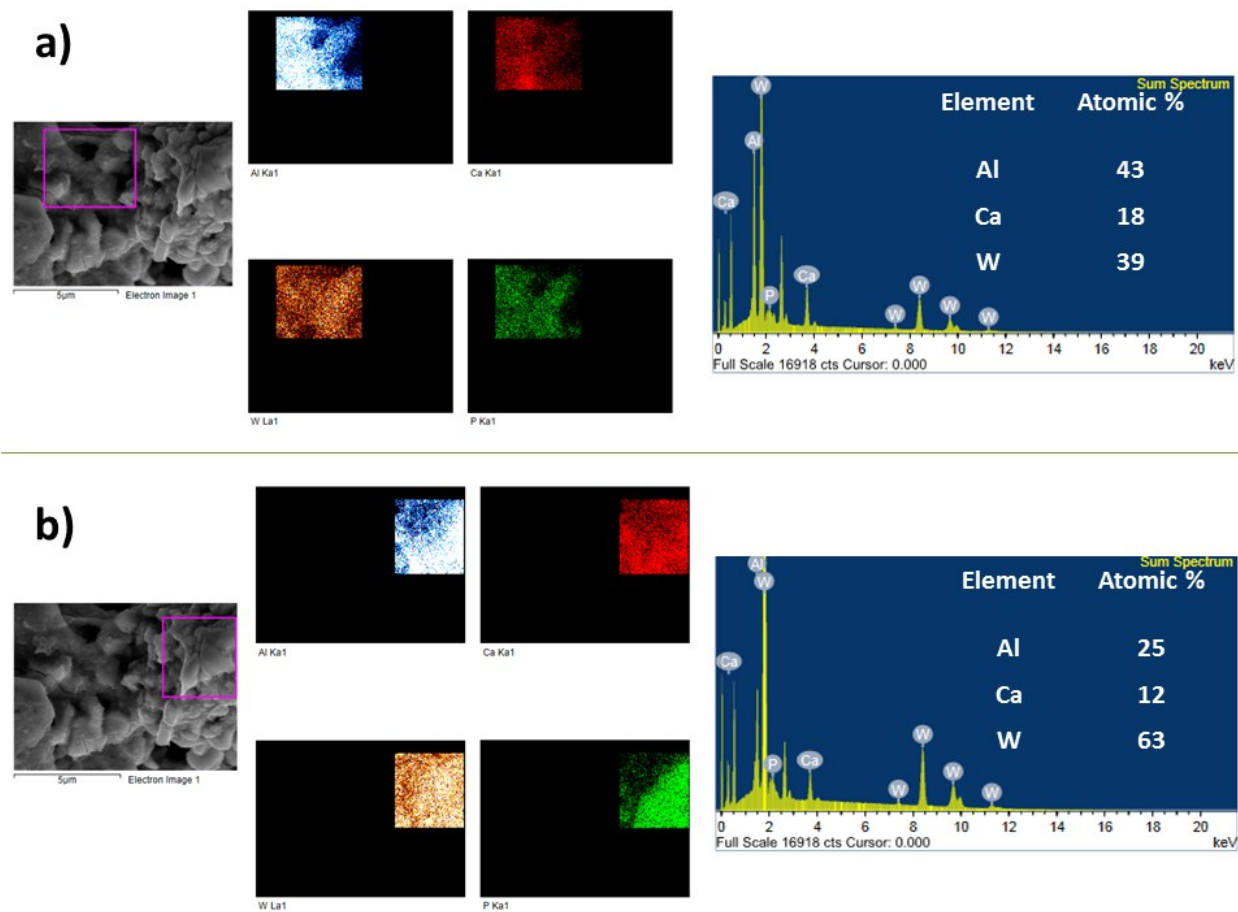

**Fig S2.** EDS mapping image of SOM 2 a) selective mapping around pore of hydrocalumite. Where concentration of **1** is less. b) Selective mapping around the surface of SOM 2 where catalyst loaded on hydrocalumite pore. Indicates **1** loaded on surface of hydrocalumite.

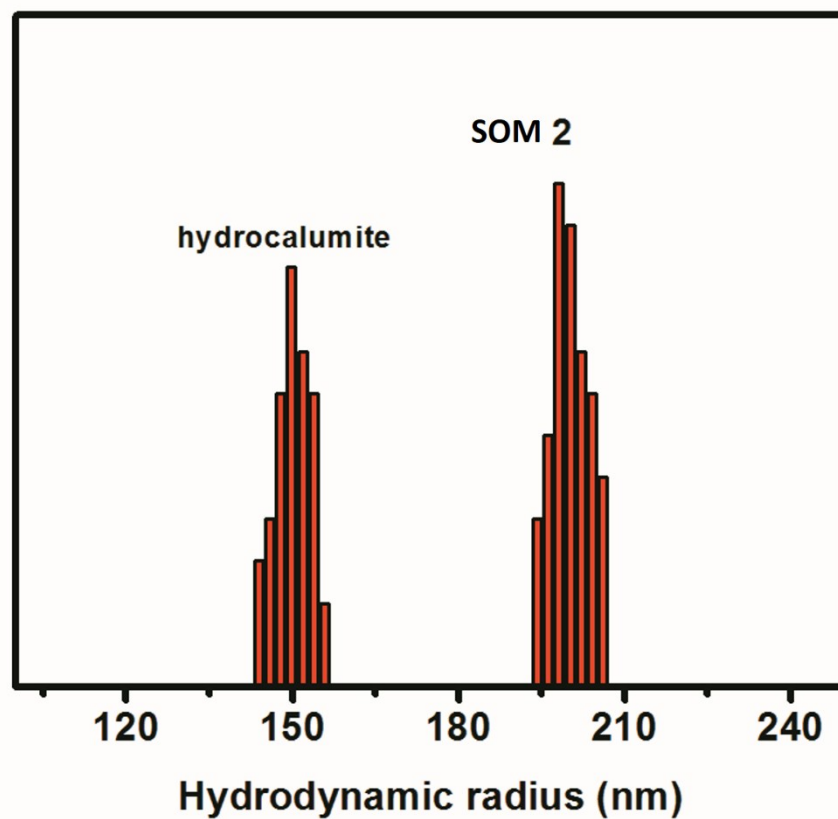

**Fig S3.** Hydrodynamic radius of hydrocalumite and SOM 2, indicates SOM 2 has larger radius compare to hydrocalumite.

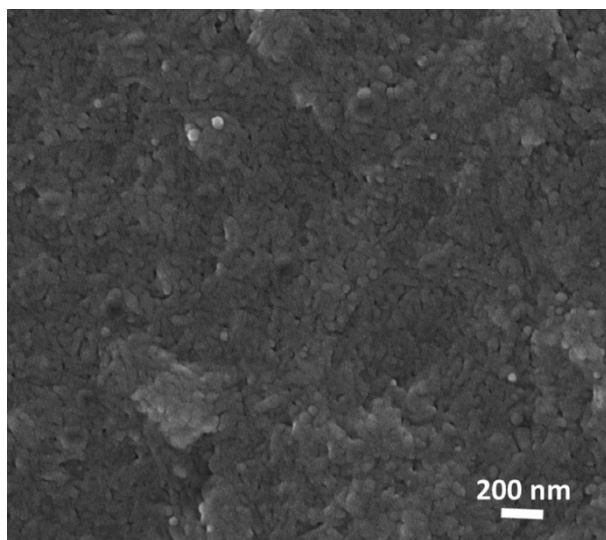

**Fig S4.** SEM image of synthesized polyacrylic acid.

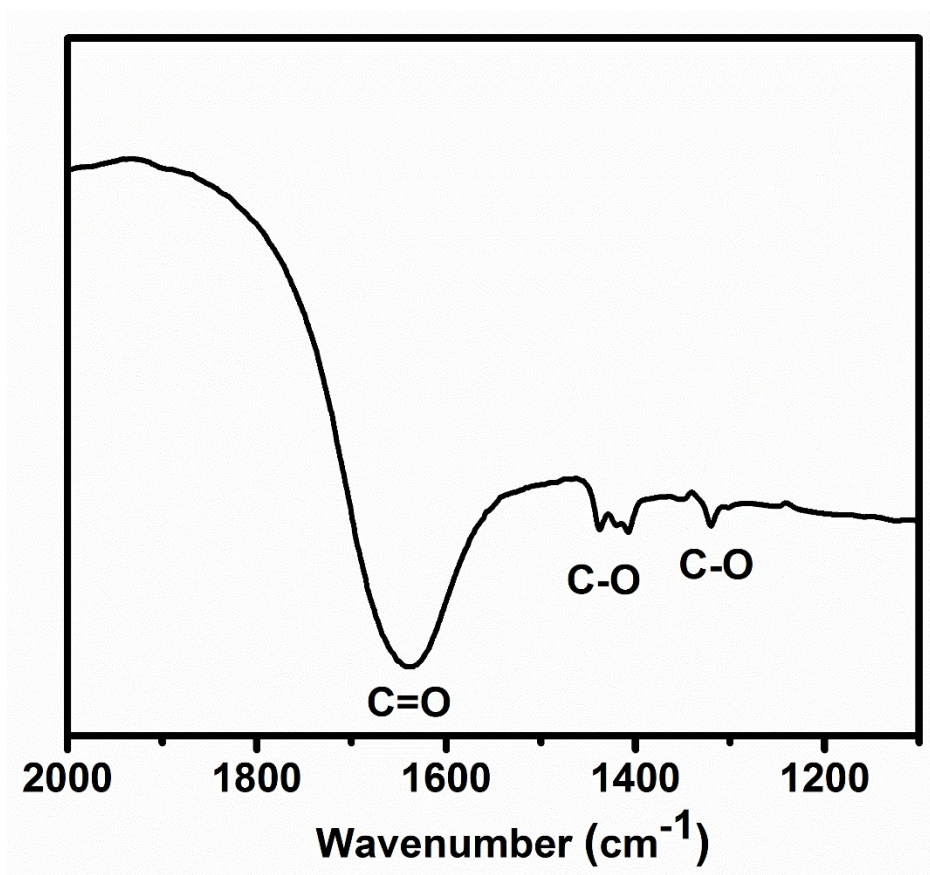

**Fig S5.** HATR-IR spectrum of synthesized polyacrylic acid.

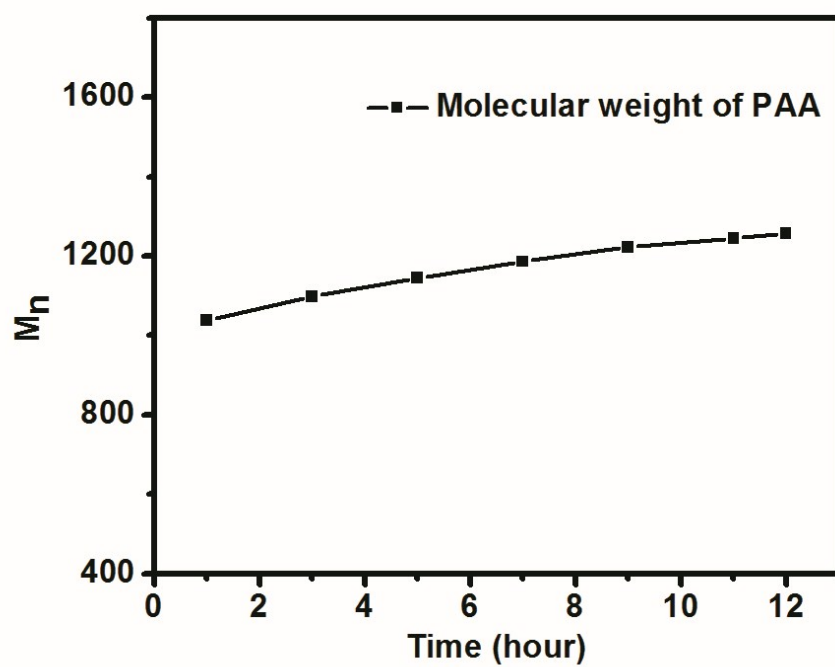

**Fig S6.** Variation of molecular weight of PAA with time.

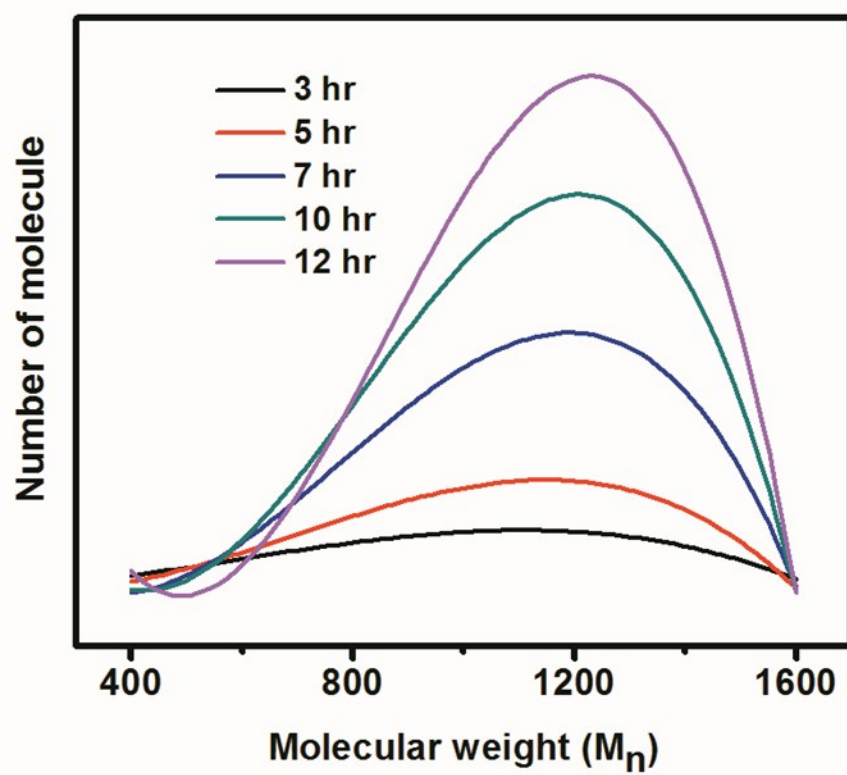

**Fig S7.** Molecular weight distribution of PAA with time.
